# Supplementary material
Source: Royal Society of Chemistry journal article supplement (doi:10.1039/d6cp00419a)
Supplement: d6cp00419a1.pdf [file d6cp00419a1.pdf]

**Supplementary Material for:**  
***Phase-dependent vacuum ultraviolet photochemistry of  
diacetylene ices: implications for Titan chemistry***

Larissa Lopes Cavalcante<sup>a</sup>, Helen E. Maynard-Casely<sup>b</sup>, Edith C. Fayolle<sup>c</sup>, Morgan L. Cable<sup>c,d</sup>, Tuan H. Vu<sup>c</sup>, Robert Hodyss<sup>c</sup>, and Courtney Ennis<sup>a,e</sup>

<sup>a</sup>Department of Chemistry, University of Otago, Dunedin 9054, New Zealand

<sup>b</sup>Australian Centre for Neutron Scattering, ANSTO, Kirrawee, NSW 2232, Australia

<sup>c</sup>Jet Propulsion Laboratory, California Institute of Technology, Pasadena, CA 91109,  
USA

<sup>d</sup>Planetary Science Institute, Tucson, AZ 85719, USA

<sup>e</sup>MacDiarmid Institute for Advanced Materials and Nanotechnology, Wellington 6140,  
New Zealand

## S1 Estimation of C<sub>4</sub>H<sub>2</sub> ice thickness and column density

The C<sub>4</sub>H<sub>2</sub> ice thickness was estimated from the integrated area of the  $\nu_4$  C–H stretching band centred at approximately 3273 cm<sup>-1</sup>. The thickness was then calculated from

$$h = \frac{2.303 \int \text{Abs}(\tilde{\nu}) d\tilde{\nu}}{\int \alpha(\tilde{\nu}) d\tilde{\nu}}$$

where  $\int \alpha(\tilde{\nu}) d\tilde{\nu}$  is the integrated extinction coefficient as appropriate for absorption measurements performed in transmission geometry.<sup>1</sup>

The column density (N) is calculated from the integrated band area according to the equation:

$$N = \frac{\int \tau_\nu d\nu}{A}$$

where  $\int \tau_\nu d\nu$  is the integrated band and A is the band strength (cm molecule<sup>-1</sup>). Because the depletion curves were analysed using normalised column densities,  $N_f/N_0$ , the absolute band strength cancels from the ratio. Therefore, the relative depletion was obtained from the ratio of the integrated areas of the selected C<sub>4</sub>H<sub>2</sub> IR band at each fluence to its initial integrated area.

## S2 Supplementary Figures

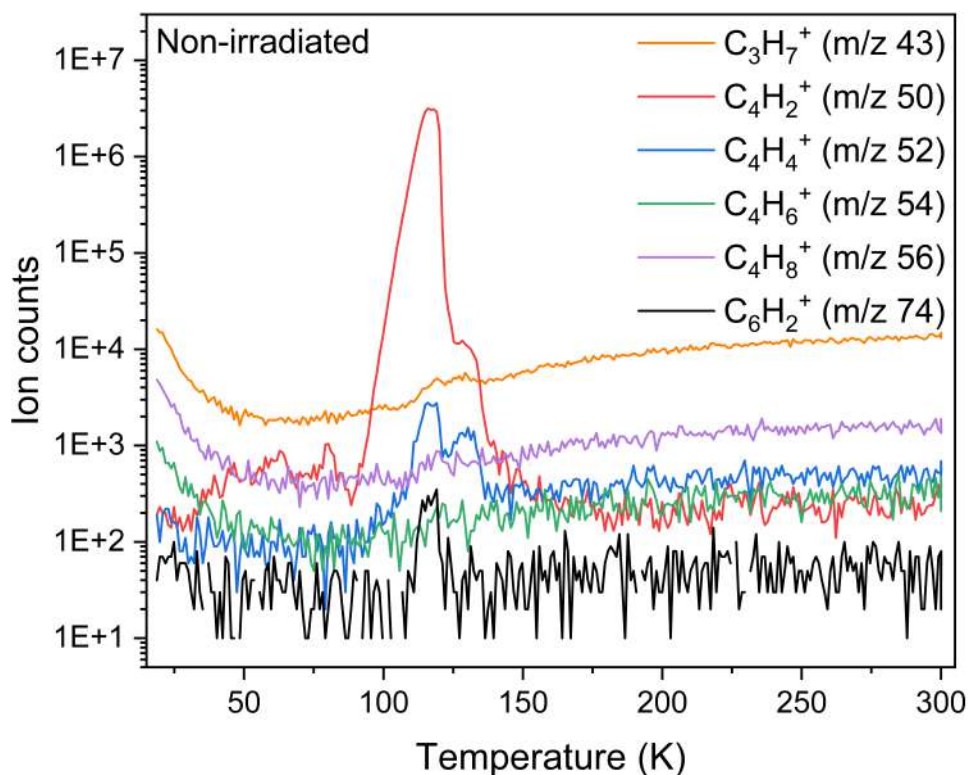

**Figure S1.** Ion counts for the target ions with  $m/z$  43, 52, 54, 56 and 74 during TPD throughout the temperature ramp to 300 K of C<sub>4</sub>H<sub>2</sub> without exposure to VUV irradiation (blank experiment). The  $m/z$  50 corresponding to C<sub>4</sub>H<sub>2</sub><sup>+</sup> is shown in red as a reference.

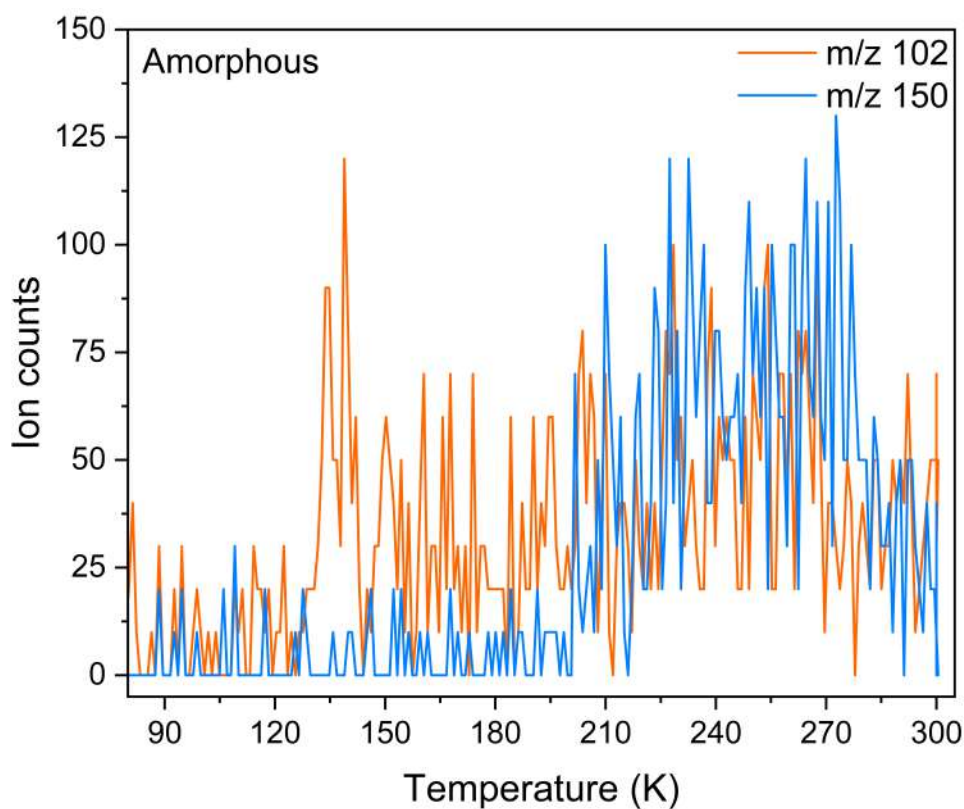

**Figure S2.** Ion counts for ions with  $m/z$  102 and 150 detected for the amorphous ice irradiated at 20 K.

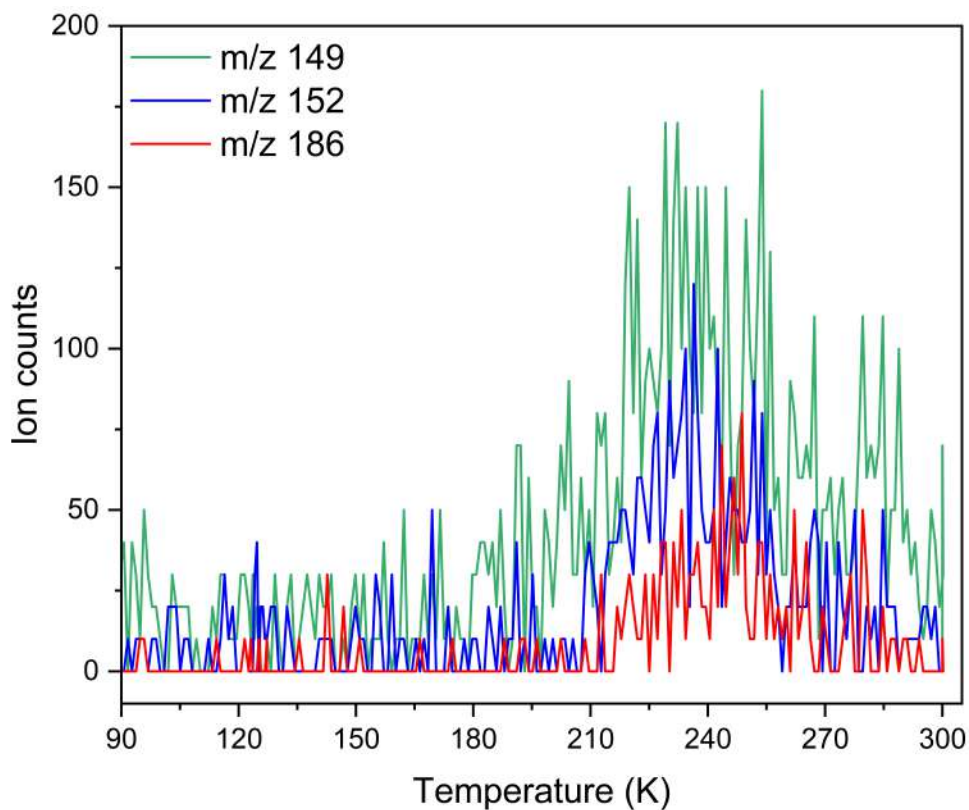

**Figure S3.** Ion counts for ions with  $m/z$  149, 152 and 186 detected for the crystalline ice irradiated at 70 K.

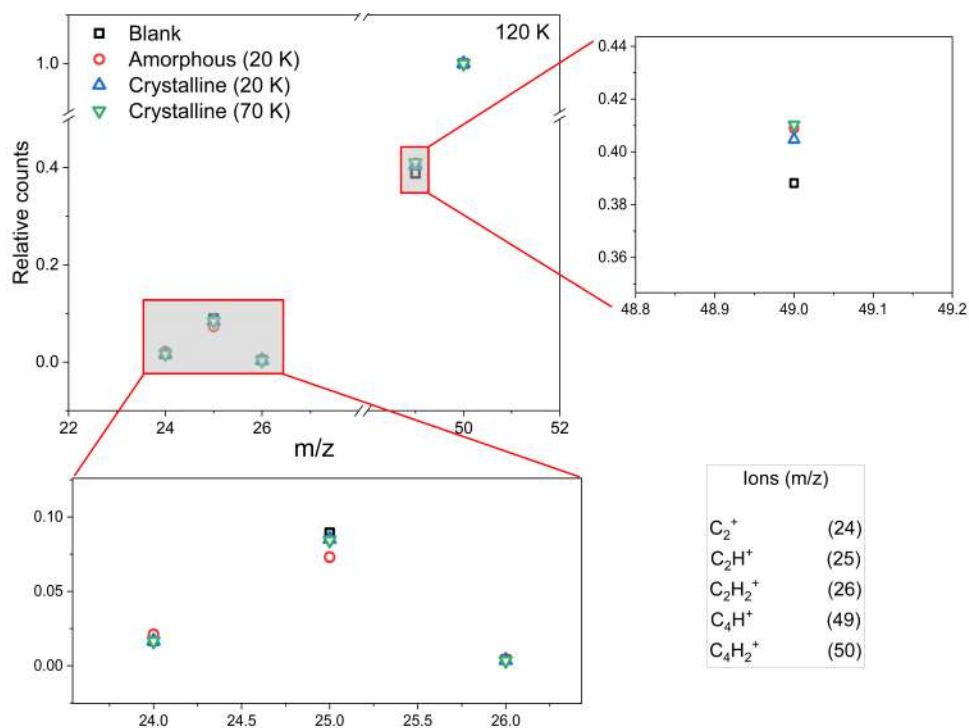

**Figure S4.** Relative counts for each expected radical formed during the photolysis of  $C_4H_2$ .

## References

- [1] R. L. Hudson, M. J. Loeffler, R. F. Ferrante, P. A. Gerakines and F. M. Coleman, *The Astrophysical Journal*, 2020, **891**, 22.
